# Supplementary material for: Fabrication and Characterization of Zein Composite Particles Coated by Caseinate-Pectin Electrostatic Complexes with Improved Structural Stability in Acidic Aqueous Environments
Source: MDPI journal article supplement (doi:10.3390/molecules24142535), 2019-07-11
Supplement: s1 [file s1]

Fabrication and characterization of zein composite particles coated by  
caseinate-pectin electrostatic complexes with improved structural stability in acidic  
aqueous environment

Yaqiong Zhang <sup>1</sup>, Bo Wang <sup>1</sup>, Yan Wu <sup>1</sup>, Boyan Gao <sup>1,\*</sup>, Liangli (Lucy) Yu <sup>2</sup>

<sup>1</sup> *Department of Food Science & Engineering, School of Agriculture and Biology,  
Shanghai Jiao Tong University, Shanghai 200240, China*

<sup>2</sup> *Department of Nutrition and Food Science, University of Maryland, College Park,  
MD 20742, United States*

\* To whom correspondence should be addressed:

Boyan Gao, Ph. D.

Tel.: 86-021-34204538; E-mail: gaoboyan@sjtu.edu.cn

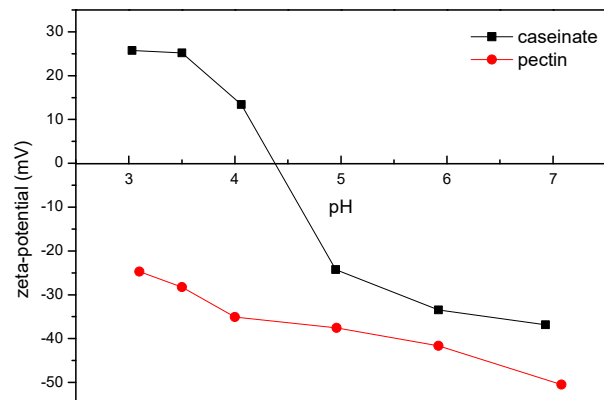

**Figure S1.**  $\zeta$ -potential as a function of pH of **caseinate** (■) and pectin (●) aqueous solutions. The concentration of **caseinate** and pectin is 1 mg/mL, respectively.

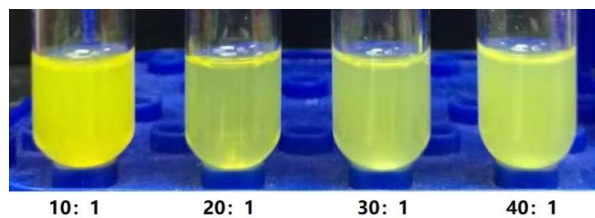

**Figure S2.** Visual appearance of the freshly-prepared **Cur**-loaded zein-**caseinate**-pectin particle dispersions in water.
